# Supplementary material
Source: PubMed Central journal article supplement (PMC7008004)
Supplement: NIHMS1062421-supplement-1.pdf [file NIHMS1062421-supplement-1.pdf]

1 SUPPLEMENTAL FIGURES

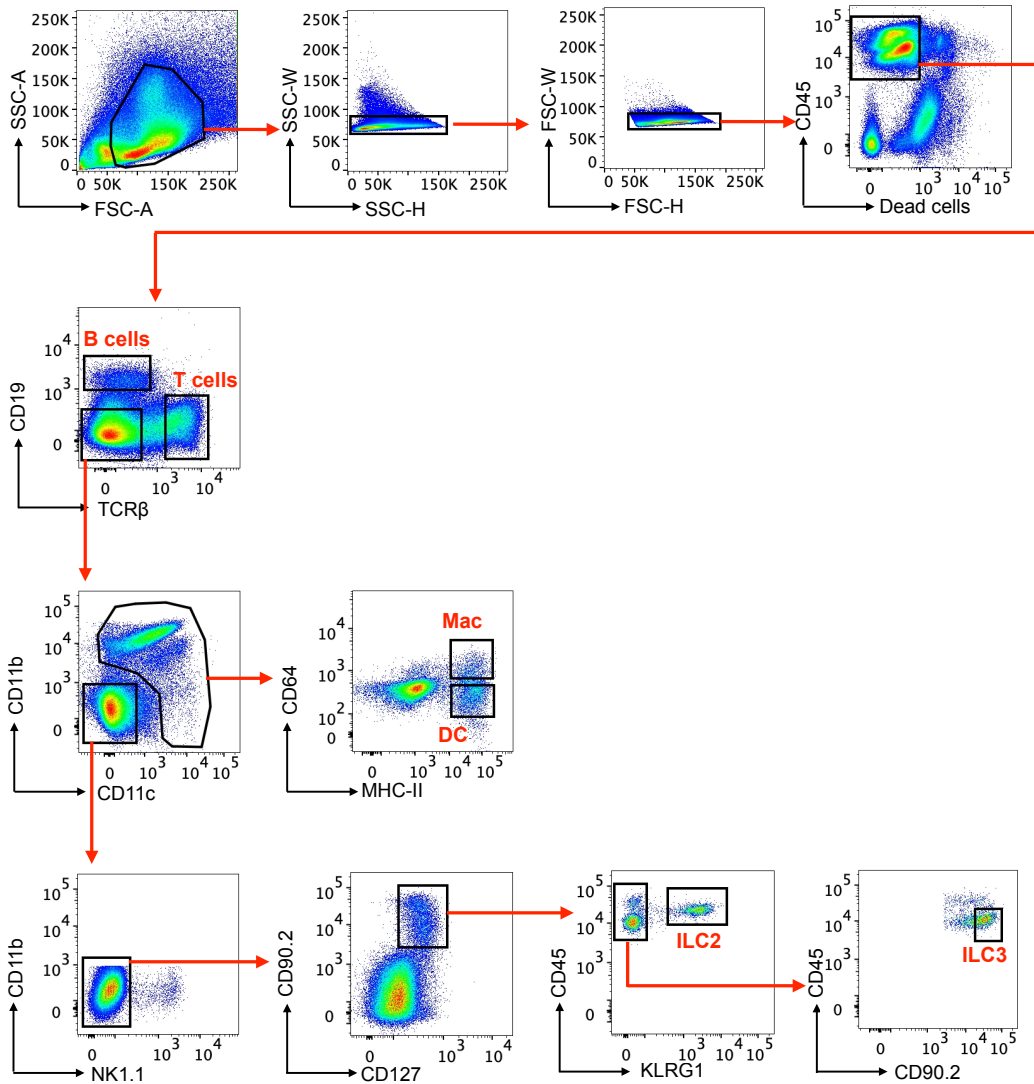

2

3 **Figure S1. Gating strategy for sorting immune cells from the small intestine of C57BL/6 mice.** A  
4 defined gating strategy was employed for sorting immune cell populations from the small intestine,  
5 including B cells, T cells, macrophages, dendritic cells, ILC2 and ILC3.

6

7

8

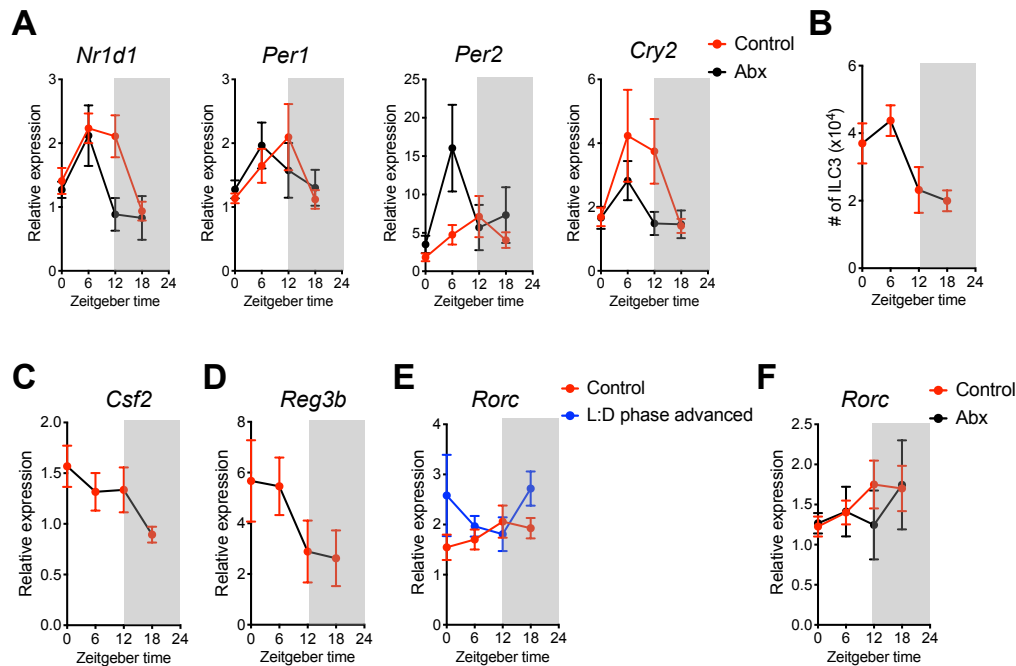

1

2 **Figure S2. Circadian regulation of ILC3 by light cues and microbiota-derived signals.** A. qPCR

3 analyses of indicated genes on sort-purified ILC3 from SI-LP of conventionally housed C57BL/6 mice or

4 mice treated with Abx for 2 weeks. Both groups of mice were sacrificed at ZT0, ZT6, ZT12 and ZT18

5 within a 24-hour cycle. The gene expression at each time point was first normalized to *Actb2*, then further

6 normalized to the sample with lowest expression at ZT0 within each group (n=6/group, pooled from 2

7 independent assays). B. Isolation of ILC3 from SI-LP of C57BL/6 mice sacrificed at ZT0, ZT6, ZT12 and

8 ZT18 within a 24-hour cycle (n=6, pooled from 2 independent assays). C. qPCR analysis of *Csf2*

9 expression on sort-purified ILC3 from SI-LP of C57BL/6 mice sacrificed at ZT0, ZT6, ZT12 and ZT18

10 within a 24-hour cycle. The relative gene expression was normalized as Fig. 1C (n=6, pooled from 2

11 independent assays). D. qPCR analysis of *Reg3b* expression on small intestinal epithelial cells from

12 C57BL/6 mice sacrificed at ZT0, ZT6, ZT12 and ZT18 within a 24-hour cycle. The relative gene

13 expression was normalized as Fig. 1C (n=6, pooled from 2 independent assays). E. qPCR analysis of

14 *Rorc* expression on sort-purified ILC3 from SI-LP of C57BL/6 mice housed in standard light:dark cycle

15 or mice housed in 9-hour advanced light:dark cycle, both groups of mice were sacrificed at ZT0, ZT6,

16 ZT12 and ZT18 within a 24-hour cycle. The relative gene expression is calculated as Fig. 1D (n=6/group,

1 pooled from 2 independent assays). **F.** qPCR analysis of *Rorc* expression on sort-purified ILC3 from SI-  
2 LP of conventionally housed C57BL/6 mice or mice treated with Abx for 2 weeks. Both groups of mice  
3 were sacrificed at ZT0, ZT6, ZT12 and ZT18 within a 24-hour cycle. The relative gene expression is  
4 calculated as Fig. S2A (n=6/group, pooled from 2 independent assays). Results are shown as the mean  $\pm$   
5 s.e.m.

6

7

8

9

10

11

12

13

14

15

16

17

18

19

20

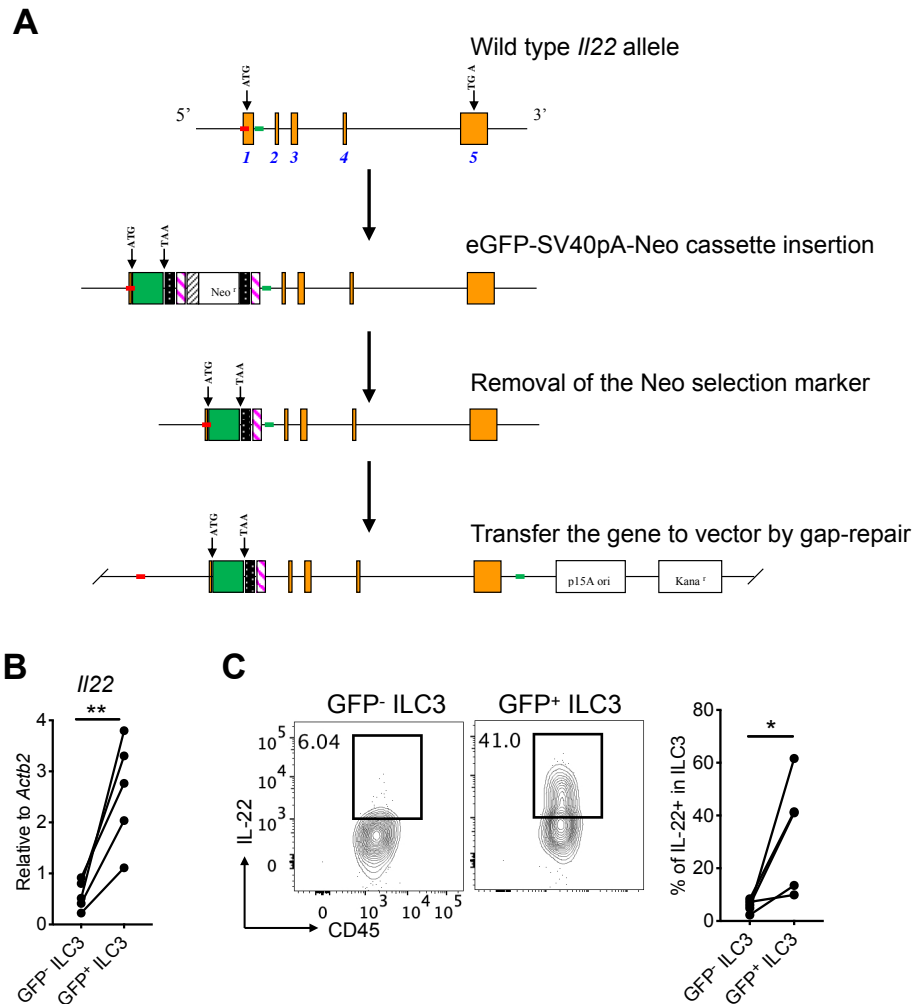

1

2 **Figure S3. Construct design and experimental validation of BAC transgenic IL-22-eGFP reporter**

3 **mice.** **A.** On a bacterial artificial chromosome, an eGFP construct was inserted downstream of exon 1

4 within the *Il22* locus. **B.** qPCR analysis of *Il22* expression on sort-purified GFP<sup>-</sup> ILC3 and GFP<sup>+</sup> ILC3

5 from SI-LP of IL-22-eGFP mice. The gene expression was normalized to *Actb2* (n=5, pooled from 2

6 independent assays). **C.** Representative flow cytometry plots and bar graph of frequency of IL-22<sup>+</sup> cells

7 from sort-purified GFP<sup>-</sup> ILC3 and GFP<sup>+</sup> ILC3 after 4-hour *in vitro* re-stimulation with PMA and

8 Ionomycin. Cells were gated as Fig. 2C (n=5, pooled from 2 independent assays). Statistics are calculated

9 by paired two-tailed Student's *t*-test.

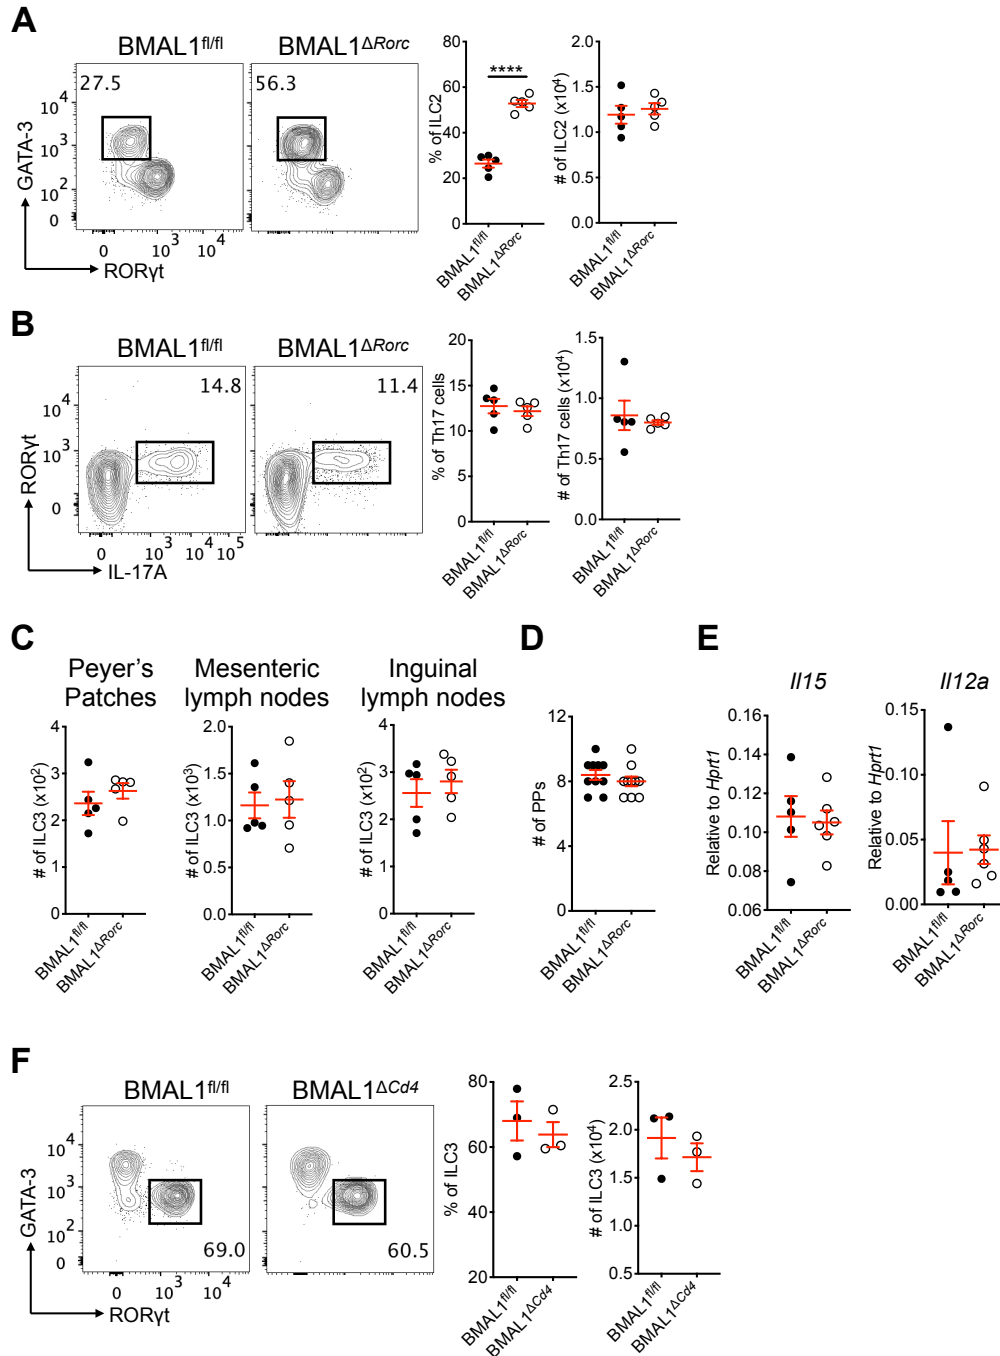

1

2 **Figure S4. BMAL1<sup>ΔRorc</sup> mice have intact ILC2 and Th17 cell responses in the intestine, and similar**  
 3 **cellularity of ILC3 in lymphoid tissues. A and B.** Representative flow cytometry plots and bar graphs of  
 4 frequency and cell numbers of SI-LP ILC2 (A) and Th17 cells (B) from BMAL1<sup>fl/fl</sup> mice and BMAL1<sup>ΔRorc</sup>  
 5 mice. Cells were gated on live CD45<sup>+</sup>Lin<sup>-</sup>CD90.2<sup>+</sup>CD127<sup>+</sup> for ILC2 and CD45<sup>+</sup>CD3ε<sup>+</sup>CD4<sup>+</sup> for Th17

1 cells (representative of 4 independent assays). **C.** Bar graphs of cell numbers of ILC3 in Peyer's Patches,  
2 mesenteric lymph nodes, inguinal lymph nodes from  $BMAL1^{fl/fl}$  mice and  $BMAL1^{\Delta Rorc}$  mice  
3 (representative of 4 independent assays). **D.** Bar graphs of Peyer's Patch numbers from small intestine of  
4  $BMAL1^{fl/fl}$  mice and  $BMAL1^{\Delta Rorc}$  mice (n=10, pooled from 3 independent assays). **E.** qPCR analyses of  
5 *Il15* and *Il12a* expression on sort-purified  $CD11c^+CD11b^+$  myeloid cells from SI-LP of  $BMAL1^{fl/fl}$  mice  
6 and  $BMAL1^{\Delta Rorc}$  mice. The expression of each target gene was normalized to *Hprt1* (representative of 2  
7 independent assays). **F.** Representative flow cytometry plots and bar graphs of frequency and cell  
8 numbers of SI-LP ILC3 from  $BMAL1^{fl/fl}$  mice and  $BMAL1^{\Delta Cd4}$  mice. Cells were gated as Fig. 3C. Results  
9 are shown as the mean  $\pm$  s.e.m. Statistics are calculated by unpaired two-tailed Student's *t*-test.

10

11

12

13

14

15

16

17

18

19

20

21

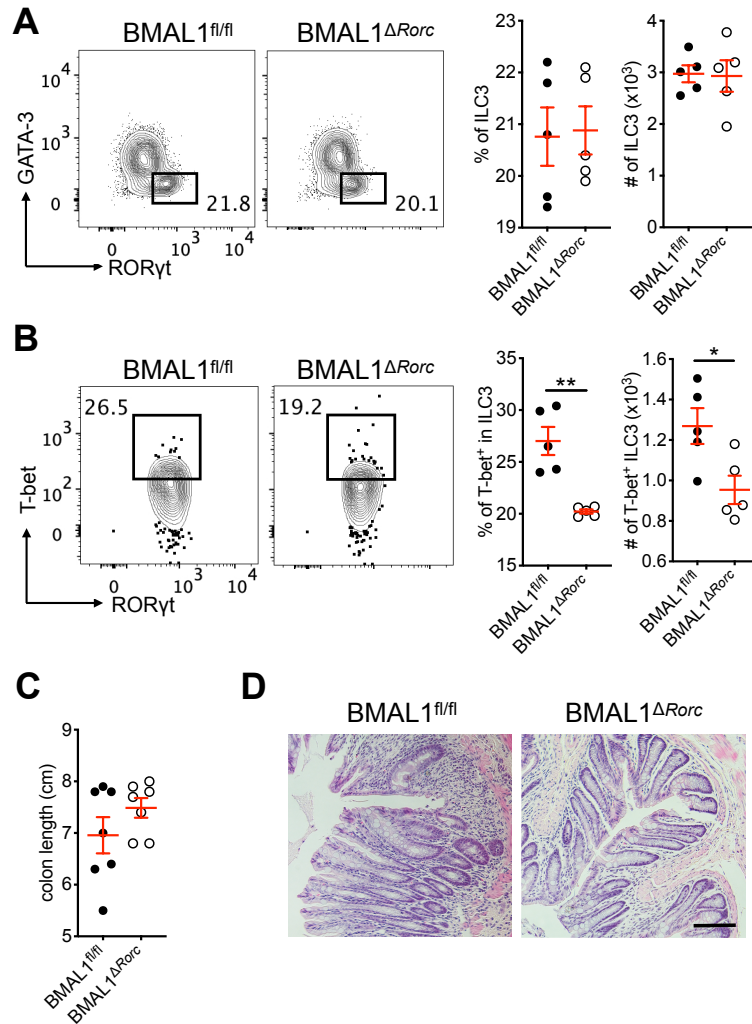

1

2 **Figure S5. BMAL1 deficiency impacts T-bet<sup>+</sup> ILC3 in the large intestine.** **A.** Representative flow

3 cytometry plots and bar graphs of frequency and cell numbers of LI-LP ILC3 from BMAL1<sup>fl/fl</sup> mice and

4 BMAL1<sup>ΔRorc</sup> mice. Cells were gated as Fig. 3C (representative of 4 independent assays). **B.**

5 Representative flow cytometry plots and bar graphs of frequency and cell numbers of T-bet<sup>+</sup> ILC3 from

6 LI-LP of BMAL1<sup>fl/fl</sup> mice and BMAL1<sup>ΔRorc</sup> mice. Cells were gated as Fig. 3D (representative of 4

7 independent assays). **C.** Bar graph of colon length of BMAL1<sup>fl/fl</sup> mice and BMAL1<sup>ΔRorc</sup> mice at day 13

8 after administration of DSS (pooled from 2 independent assays). **D.** Representative H&E staining sections

9 of distal colon from BMAL1<sup>fl/fl</sup> mice and BMAL1<sup>ΔRorc</sup> mice at day 13 after administration of DSS. The

1 scale bar represents 100 $\mu$ m. Results are shown as the mean  $\pm$  s.e.m. Statistics are calculated by unpaired  
2 two-tailed Student's *t*-test.

3

4

5

6

7

8

9

10

11

12

13

14

15

16

17

18

19

20



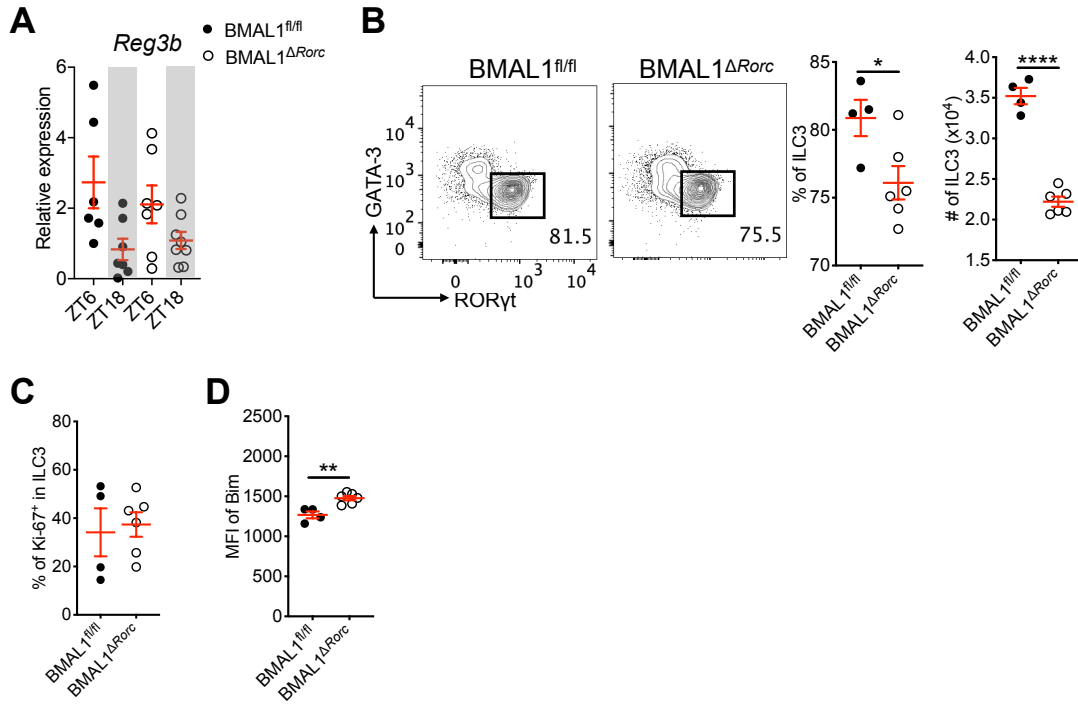

1  
2 **Figure S6. BMAL1 deficiency impairs intestinal ILC3 at weaning.** **A.** qPCR analysis of *Reg3b* on  
3 small intestinal epithelial cells from BMAL1<sup>fl/fl</sup> mice and BMAL1<sup>ΔRorc</sup> mice. Both groups of mice were  
4 sacrificed at ZT6 and ZT18. The relative gene expression was normalized as Fig. 4D (n=6-8/group,  
5 pooled from 2 independent assays). **B.** Representative flow cytometry plots and bar graphs of frequency  
6 and cell numbers of SI-LP ILC3 from 4 weeks old BMAL1<sup>fl/fl</sup> mice and BMAL1<sup>ΔRorc</sup> mice. Cells were  
7 gated as Fig. 3C (representative of 2 independent assays). **C** and **D.** Bar graphs of frequency of Ki-67<sup>+</sup>  
8 ILC3 (**C**) and MFI of Bim expression in ILC3 (**D**) from SI-LP of 4 weeks old BMAL1<sup>fl/fl</sup> mice and  
9 BMAL1<sup>ΔRorc</sup> mice (representative of 2 independent assays). Results are shown as the mean ± s.e.m.  
10 Statistics are calculated by unpaired two-tailed Student's *t*-test.

11  
12  
13  
14

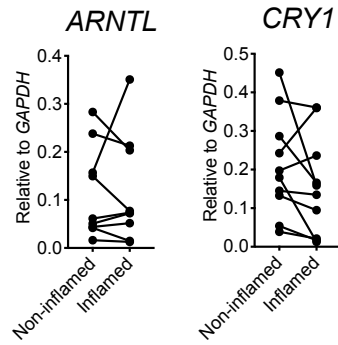

1

2 **Figure S7. Analysis of circadian genes in intestinal ILC3 from IBD patients.** qPCR analyses of  
 3 indicated circadian genes on sort-purified ILC3 from distal non-inflamed versus matched inflamed  
 4 surgical resection tissues of IBD patients. The expression of each target gene was normalized to *GAPDH*.

5

6

7

8

9

10

11

12

13

14

15

16

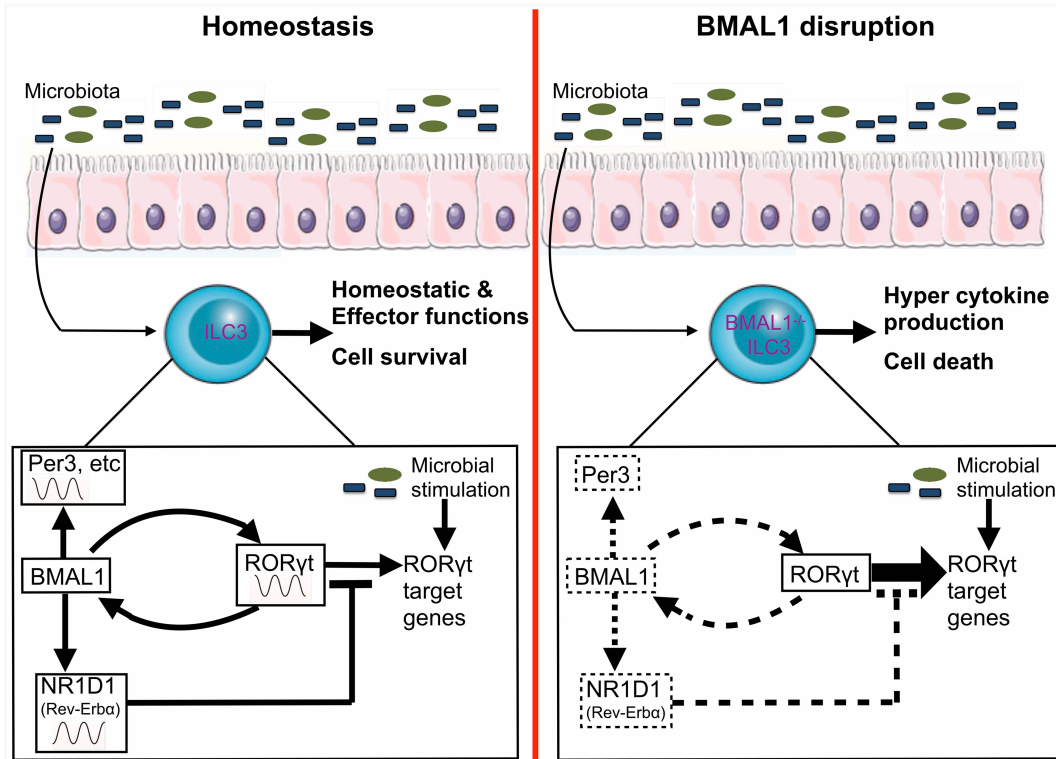

1  
 2 **Figure S8. A circadian clock is essential for homeostasis of group 3 innate lymphoid cells in the gut.**  
 3 ILC3 exhibit a cell-intrinsic circadian clock that is required for normal gene expression and homeostasis  
 4 in the presence of a complex microbiota. ILC3-specific BMAL1 was required for Per3 and NR1D1  
 5 expression, fine-tuning of RORγt-mediated transcription in response to microbiota-derived signals, and  
 6 maintenance of cellular homeostasis. In the absence of cell-intrinsic BMAL1, ILC3 exhibit impaired  
 7 expression of Per3 and NR1D1, hyper-activation of RORγt-dependent target genes in response to the  
 8 microbiota, and cell death. Thus, the circadian regulation is essential for homeostasis of ILC3 with the  
 9 microbiota, and this becomes disrupted in the context of IBD.

10  
 11  
 12  
 13

| Disease type       | Age when collected | Sex | Race/Ethnicity | Antibiotic, currently | Antibiotic, ever | anti-TNF treatment, currently | anti-TNF treatment, ever |
|--------------------|--------------------|-----|----------------|-----------------------|------------------|-------------------------------|--------------------------|
| Crohn's            | 24                 | M   | Caucasian      | Yes                   | Yes              | No                            | No                       |
| Crohn's            | 39                 | M   | Caucasian      | Yes                   | Yes              | No                            | Yes                      |
| Crohn's            | 57                 | M   | NA             | Yes                   | Yes              | No                            | Yes                      |
| Crohn's            | 26                 | F   | Caucasian      | Yes                   | Yes              | Yes                           | Yes                      |
| Crohn's            | 31                 | F   | NA             | Yes                   | Yes              | Yes                           | Yes                      |
| Crohn's            | 33                 | F   | Caucasian      | Yes                   | Yes              | No                            | Yes                      |
| Crohn's            | 35                 | F   | Hispanic       | Yes                   | Yes              | Yes                           | Yes                      |
| Crohn's            | 37                 | F   | Caucasian      | No                    | No               | No                            | Yes                      |
| Crohn's            | 56                 | F   | NA             | No                    | Yes              | Yes                           | No                       |
| Ulcerative Colitis | 36                 | M   | Caucasian      | NA                    | Yes              | No                            | No                       |

NA: not available

1

2 **Table S1. Clinical metadata associated with the human samples.**

3

4

5

6

7

8

9

10

11

| <b>Primers</b>                | <b>Sequence (5' to 3') or catlog number</b> |
|-------------------------------|---------------------------------------------|
| <i>Actb2</i> (mouse)          | Qiagen QT01136772                           |
| <i>Nr1d1</i> -forward (mouse) | TACATTGGCTCTAGTGGCTCC                       |
| <i>Nr1d1</i> -reverse (mouse) | CAGTAGGTGATGGTGGGAAGTA                      |
| <i>Per1</i> -forward (mouse)  | TTCGTGGACTTGACACCTCTT                       |
| <i>Per1</i> -reverse (mouse)  | GGGAACGCTTTGCTTTAGAT                        |
| <i>Cry2</i> -forward (mouse)  | CACTGGTTCGCAAAGGACTA                        |
| <i>Cry2</i> -reverse (mouse)  | CCACGGGTGCGAGGATGTAGA                       |
| <i>Nfil3</i> -forward (mouse) | CTTTCAGGACTACCAGACATCCAA                    |
| <i>Nfil3</i> -reverse (mouse) | GATGCAACTTCCGGCTACCA                        |
| <i>Arntl</i> -forward (mouse) | AACCTTCCCAGCAGCTAACAG                       |
| <i>Arntl</i> -reverse (mouse) | AGTCCTCTTTGGGCCACCTT                        |
| <i>Per2</i> -forward (mouse)  | CACACTTGCCTCCGAAATAACTC                     |
| <i>Per2</i> -reverse (mouse)  | AGCGCACGGCTGTCTGA                           |
| <i>Per3</i> -forward (mouse)  | AAAAGCACCACGGATACTGGC                       |
| <i>Per3</i> -reverse (mouse)  | GGGAGGCTGTAGCTTGTCA                         |
| <i>Rorc</i> (mouse)           | Qiagen QT00197722                           |
| <i>Il22</i> -forward (mouse)  | GCTCAGCTCCTGTCACATCA                        |
| <i>Il22</i> -reverse (mouse)  | CAGTCCCCCAATCGCCTTGA                        |
| <i>Reg3b</i> (mouse)          | Qiagen QT00239302                           |
| <i>Il17a</i> (mouse)          | Qiagen QT00103278                           |
| <i>Csf2</i> (mouse)           | Qiagen QT00251286                           |
| <i>Il15</i> -forward (mouse)  | ACATCCATCTCGTGCTACTTGT                      |
| <i>Il15</i> -reverse (mouse)  | GCCTCTGTTTTAGGGAGACCT                       |
| <i>Il12a</i> (mouse)          | Qiagen QT01048334                           |
| <i>Hprt1</i> -forward (mouse) | CTTGCTGGTGAAAAGGACCTCTC                     |
| <i>Hprt1</i> -reverse (mouse) | GAAGTACTCATTATAGTCAAGGGCA                   |
|                               |                                             |
| <i>GAPDH</i> -forward human)  | GGAGCGAGATCCCTCCAAAAT                       |
| <i>GAPDH</i> -reverse (human) | GGCTGTTGTCATACTTCTCATGG                     |
| <i>NR1D1</i> (human)          | Qiagen QT00000413                           |
| <i>PER3</i> (human)           | Qiagen QT00097713                           |
| <i>NFIL3</i> (human)          | Qiagen QT00013944                           |
| <i>ARNTL</i> (human)          | Qiagen QT00011844                           |
| <i>CRY1</i> (human)           | Qiagen QT00025067                           |

1

2 **Table S2. Primers used in the study.**

3
